# Supplementary material
Source: PubMed Central journal article supplement (PMC1761959)
Supplement: plntphys_pp.106.089805_1.pdf [file plntphys_pp.106.089805_1.pdf]

**Supplemental data 1:** Sequence alignment of the members of the two monophyletic lineages within the AtMIKC\* subgroup.

```

AGL30      MGRVKLKIKKLENTNGRQSTFAKRKNGILKKANELSILCDIDIVLLMFSPGKAAICCGT 60
AGL94      MGRVKLKIKKLNQMNNGRRCTYTKRRHGIMKKAKELSILCDIDVLLMFSPMGKASICIG- 59
AGL65      MGRVKLKIKRLESTSNRQVTTYTKRNGILKKAKELSILCDIDIVLLMFSPGKAAICCGT 60
*****:*:. . .*: :*:*:*:*:*:*:*:*:*:*:*:*:*:*:*:*:*:*:*:*:*:*:

AGL30      RSSMEEVIAKFSQVTPQERTKRFESLENLKKTFQKLDHVDNIREFIASSNS-TVEDLST 119
AGL94      KHSIGEVIKFAQLSPQERAKRKLLENLEALRKTFMKANHDIDISKFLDRISTPTVEVLSE 119
AGL65      HSCIEEVISKFAQLTPQERTKRFESLENLKKTFQKLDHVDNIREFIASSNS-TVEDLST 119
: .: **:*:*. :*:*:*:*:*:*. * *:* * * :*:*:* .*: . *:* **

AGL30      QARILQARISEIHGRLSYWTPEPKINNVEHLGQLEISIRQSLDQLRAHKEHFGQQQQAMQ 179
AGL94      KIRFLQTLQSDIHLRSLSYWTDVNDNDSVDVLQQLLEHSLRQSLAQIYGRKASMPQRQQQL 179
AGL65      QVAIYQAQLMECHRRLSCWTNIDRIENTEHLDLLEESLRKSIERIQIHKEHYRKNQLLPI 179
: : *::: : * ** * : * . : : * * * : * : : * : : * : : *

AGL30      IENANFVKDWSCTSMQDGIQIPILEQQQLQSMWILNSNTTNIIVTEEHSIPIQ-----REVE 234
AGL94      MS--SQCKNQLQTEIDIDFGMEMEQQLLENFVSWVRTDENMNVPIEEEDPNLQLHMYKIDIT 237
AGL65      ECATQFHSGIQLPAMMGNSMQEAHS-MSWLPDNDHQQTILPGDSSFLP-----H 230
. . . : . : : : : : : : : : : : : : : : : : : : : : :

AGL30      CSASSFGSYPGYFGTGKSPEMTIPGQETSFLDELNTG-----QLKQDTS-QQQFTN 286
AGL94      CSASSALGNYSGLFSKS-----SDILQKLETG-----SIPGTSADPNQQFSN 279
AGL65      REMDGSIPVYSSCFEFTKPEDQICSNPGQQFEQLEQQGNGCLGLQQLGEEYSYPTPFGT 290
. . . : * . * . . : : : * : . . . * .

AGL30      NNNITAYNPNLHNDMNHQTLPPPPLPLTLPHAQVYIPMNQREYHMGFFFAFPDPSAY 346
AGL94      ---LSFLNDQKQLQLAEWSLLGSP-----ADYYVQILEAS-----Y 313
AGL65      TLGMEEDQEKIKSEMELNNLQQQQQQQQQQQDPSMYDPMANNNGGCFQIHPHDSMFV 350
: : : : . . * . . : : .

AGL30      NDNTNQTRFGSSSSSLPCSISMDFEYLFQMQPN---- 381
AGL94      KPQIGGKNGGASSETLPY-VAVFDDPLYFWVNNGCSS-- 349
AGL65      NDHHHHHHHHHQNWVPDSMFGQTSYNQVCVFTPPLELSR 389
: : . . . . .

AGL66      MGRVKLEIKRIENTTNRQVTFSKRRNGLIKKAYELSILCDIDIALLMFSPDRLSLFSGK 60
AGL104     MGRVKLEIKRIENTTNRQVTFSKRRNGLIKKAYELSILCDIDIALLMFSPDRLSLFSGK 60
AGL67      MGRVKLEIKRIEKSTNRQITFSKRKGLIKKAYELSTLCDIDLALLMFSPDRLCFLSGQ 60
*****:*:*. :*:*:*:*:*:*:*:*:*:*:*:*:*:*:*:*:*:*:*:*:*:*:

AGL66      TRIEDVFSRYINLSDQERENALVFPDQSRPDPQSKEYLLRTLQQLKAENDIALQLTN-- 118
AGL104     TRIEDVFSRYINLSDQERENALVFPDQSRPDPQSKEYLLRTLQQLKAENDIALQLTN-- 118
AGL67      TRIEDVFSRYINLSDQERENALVFPDQSRPDPQSKEYLLRTLQQLKAENDIALQLTN-- 120
*****:*:*. :*:*:*:*:*:*:*:*:*:*:*:*:*:*:*:*:*:*:*:*:*:*:

AGL66      PTAINS DVE-ELEHEVYKLLQQLLMAEEELRKYEPDPIRFTTMEEYETCEKQLMDTLTRV 177
AGL104     PAAINS DVE-ELEHEVYKLLQQLLMAEEELRKYEPDPIRFTTMEEYEVSEKQLLDLTLTHV 177
AGL67      PEATNSNVEVELEQEVCRLLQQLQISEEELRKYEPDPIRFTTMEEYEVSEKQLLDLTLTHV 180
* * *:* ** *:* * :*:* * :*:* * :*:* * :*:* * :*:* * :*:* *

AGL66      NQRREHILSQDQLSSYEASALQQQSMGGPFNDVVGWLTENGPNEAHLFDASAHS--- 234
AGL104     VQRRLHLS-NHLSSYEASTMQPN--IGGPFVNDVVGWLPENGTNQLHFDASAHSNQL 234
AGL67      VQRREHLR---KSCEAQSNOQS--MDGILLNDIVEDWGPEPEPKQAHMIAHSAHS-- 232
***:*: . * * : * . : * : * : * * * . * * : : : * : *

AGL66      ----AMYETLQGSSSSSNQNIMGESNVSNHNGDMFQEWQAQYNSTTAHPSTLFP 289
AGL104     RELSSAMYEPPLQGSSSSSNQNIMGESNVSNHNGDMFQEWQAQYNSTTAHPSTLFP 287
AGL67      ---NQPSYDLLRRSNSSSNQPK----- 253
. * : * : * * * * *

AGL66      QHQHGLVVDPNIEEIE-----IPVMKKAQADHEVSDYDIRMPQLSSQ 332
AGL104     QQQH-EGVGPSIEEMMPAQSDIPGVTAETQVDHEVSDYETKVPQLSSQ 335
AGL67      -----

```
