# Supplementary material
Source: PubMed Central journal article supplement (PMC1761959)
Supplement: plntphys_pp.106.089805_2.pdf [file plntphys_pp.106.089805_2.pdf]

## Supplemental data 2: Overview of all sequences enriched by AtMIKC\* protein complexes in RBSS

Part of the flanking sequences is included (in gray). Imperfect motifs – not corresponding to the consensus – are highlighted in green, whereas perfect SRE, MEF2 and N9 motifs are marked in yellow. These results are summarized in Figure 2A.

### AGL65/66

#### Non-CArG and CArG-like

TTCAGCGGATCCTGTCGAACAGTTGATAATAATGGAGGTGAATTCAGTGCAACTGC  
TTCAGCGGATCCTGTCGATTTACTTTTTATGGAGAGGCCAATTCCTTGCAACTGCG  
TTCAGCGGATCCTGTCGTTTTATATTTAGCATGTGAGGCGAATTCAGTGCAACTGCG  
TTCAGCGGATCCTGTCGTTTTTACCTATTCCGAGGCGAATTCAGTGCAACTGCG  
TTCAGCGGATCCTGTCGTCACATATTCTATTCTGAGGCGAATTCAGTGCAACTGCG  
TTCAGCGGATCCTGTCGCGGCTATTTATTTCCGGAGGCGAATTCAGTGCAACTGCG

TTCAGCGGATCCTGTCGTCTCTATTTTAAGCATGAGGCGAATTCAGTGCAACTGCG  
TTCAGCGGATCCTGTCGTTATTTACTATTTTAAGAGGCGAATTCAGTGCAACTGCG  
TTCAGCGGATCCTGTCGGTCTCTATTTTAAGATGAGGCGAATTCAGTGCAACTGCG  
TTCAGCGGATCCTGTCGTTTTACTATTTTAAGAAGGCGAATTCAGTGCAACTGCG  
TTCAGCGGATCCTGTCGATTCTATATTAAGTAGGAGGCGAATTCAGTGCAACTGCG  
TTCAGCGGATCCTGTCGTTGGCTATTTAAAGACGAGGCGAATTCAGTGCAACTGCG

TTCAGCGGATCCTGTCGTTATATACTATAAATGGAGGCGAATTCAGTGCAACTGCG

TTCAGCGGATCCTGTCGTTTACTATTTTGTAAAGAGGCGAATTCAGTGCAACTGCG

TTCAGCGGATCCTGTCGTAAATCCTGCTATTTTGAGGCGAATTCAGTGCAACTGCG  
TTCAGCGGATCCTGTCGCTTCCAAATATAGATCGAGGCGAATTCAGTGCAACTGCG  
TTCAGCGGATCCTGTCGTAAATTTACTATTTTCGAGGCGAATTCAGTGCAACTGCG  
TTCAGCGGATCCTGTCGTCCAAATTTAGCATTTGAGGCGAATTCAGTGCAACTGCG

TTCAGCGGATCCTGTCGGGGAATTTACTATATTGAGGCGAATTCAGTGCAACTGCG  
TTCAGCGGATCCTGTCGATAACAATATACTATTTGAGGCGAATTCAGTGCAACTGCG  
TTCAGCGGATCCTGTCGTTTTTATTTACTATTTGAGGCGAATTCAGTGCAACTGCG  
TTCAGCGGATCCTGTCGCAGGTTACTATTTTGGGAGGCGAATTCAGTGCAACT-CG  
TTCAGCGGATCCTGTCGTATACTTTTCTATTTTGAGGCGAATTCAGTGCAACTGCG  
TTCAGCGGATCCTGTCGTTTTTATTTCTATATTGAGGCGAATTCAGTGCAACTGCG  
TTCAGCGGATCCTGTCGTTAATTTGTCTATTTTGAGGCGAATTCAGTGCAACTGCG

#### CTA (TATAT) TAG

TTCAGCGGATCCTGTCGTCTATATATTAGATAGAGGCGAATTCAGTGCAACTGCG

#### SRE-type

TTCAGCGGATCCTGTCGCTTCTATTTTAGGTTTGGAGGCGAATTCAGTGCAACTGCG

**CTA (TTT) TAG / CTA (AAA) TAG**

TTCAGCGGATCCTGTCGAAGCTATTTTGTAGTAATGAGGCGAATTCAGTGCAACTGCG  
TTCAGCGGATCCTGTCGACACTATTTTGTAGTTAAGAGGCGAATTCAGTGCAACTGCG  
TTCAGCGGATCCTGTCGAGTCTATTTTGTAGTTTAGAGGCGAATTCAGTGCAACTGCG  
TTCAGCGGATCCTGTCGATATTTACTATTTTGTAGGAGGCGAATTCAGTGCAACTGCG  
TTCAGCGGATCCTGTCGCCCCTATTTTGTAGTTGGGAGGCGAATTCAGTGCAACTGCG  
TTCAGCGGATCCTGTCGCTTTTTGTCTATTTTGTAGGAGGCGAATTCAGTGCAACTGCG  
TTCAGCGGATCCTGTCGGAATATACTATTTTGTAGGAGGCGAATTCAGTGCAACTGCG  
TTCAGCGGATCCTGTCGTTAGCTATTTTGTAGATAGAGGCGAATTCAGTGCAACTGCG  
TTCAGCGGATCCTGTCGTAATTAGCTATTTTGTAGGAGGCGAATTCAGTGCAACTGCG  
TTCAGCGGATCCTGTCGTAGCTATTTTGTAGGATAGAGGCGAATTCAGTGCAACTGCG  
TTCAGCGGATCCTGTCGTATGTCTATTTTGTAGGAGAGGCGAATTCAGTGCAACTGCG  
TTCAGCGGATCCTGTCGTGGCTATTTTGTAGGGGGAGGCGAATTCAGTGCAACTGCG  
TTCAGCGGATCCTGTCGTTACTATTTTGTAGGCATGAGGCGAATTCAGTGCAACTGCG  
TTCAGCGGATCCTGTCGTTATTAGCTATTTTGTAGGAGGCGAATTCAGTGCAACTGCG  
TTCAGCGGATCCTGTCGTTTACTATTTTGTAGGAAGAGGCGAATTCAGTGCAACTGCG  
TTCAGCGGATCCTGTCGTTTACTATTTTGTAGGATGAGGCGAATTCAGTGCAACTGCG  
TTCAGCGGATCCTGTCGTTTCATACCCTATTTTGTAGGAGGCGAATTCAGTGCAACTGCG

TTCAGCGGATCCTGTCGATACTAAAATAGCGTTCGAGGCGAATTCAGTGCAACTGCG  
TTCAGCGGATCCTGTCGTATACTAAAATAGGACGAGGCGAATTCAGTGCAACTGCG  
TTCAGCGGATCCTGTCGTCCCTAAAATAGCCGTGAGGCGAATTCAGTGCAACTGCG  
TTCAGCGGATCCTGTCGTTTCTAAAATAGGTAAGAGGCGAATTCAGTGCAACTGCG

**CTA (TTTT) TAG / CTA (AAAA) TAG**

TTCAGCGGATCCTGTCGAACCTATTTTGTAGAAATGAGGCGAATTCAGTGCAACTGCG  
TTCAGCGGATCCTGTCGAACCTATTTTGTAGATAGAGGCGAATTCAGTGCAACTGCG  
TTCAGCGGATCCTGTCGACACTATTTTGTAGTATGAGGCGAATTCAGTGCAACTGCG  
TTCAGCGGATCCTGTCGACATCTATTTTGTAGCGGAGGCGAATTCAGTGCAACTGCGG  
TTCAGCGGATCCTGTCGACATTTACTATTTTGTAGAGGCGAATTCAGTGCAACT-CG  
TTCAGCGGATCCTGTCGACCTATTTTGTAGAAAGTGAAGGCGAATTCAGTGCAACTGCG  
TTCAGCGGATCCTGTCGAGCCTATTTTGTAGTTTCGAGGCGAATTCAGTGCAACTGCG  
TTCAGCGGATCCTGTCGATACTATTTTGTAGCACGAGGCGAATTCAGTGCAACTGCG  
TTCAGCGGATCCTGTCGATACTATTTTGTAGCCTGAGGCGAATTCAGTGCAACTGCG  
TTCAGCGGATCCTGTCGATCTATTTTGTAGAGCGGAGGCGAATTCAGTGCAACTGCG  
TTCAGCGGATCCTGTCGCAACTATTTTGTAGAAATGAGGCGAATTCAGTGCAACTGCG  
TTCAGCGGATCCTGTCGCACCTATTTTGTAGCCTGAGGCGAATTCAGTGCAACTGCG  
TTCAGCGGATCCTGTCGCCTCTATTTTGTAGTAAGAGGCGAATTCAGTGCAACTGCG  
TTCAGCGGATCCTGTCGCGACTATTTTGTAGCCTGAGGCGAATTCAGTGCAACTGCG  
TTCAGCGGATCCTGTCGCTCTATTTTGTAGTAGGGAGGCGAATTCAGTGCAACTGCG  
TTCAGCGGATCCTGTCGCTGCTATTTTGTAGAACGAGGCGAATTCAGTGCAACTGCG  
TTCAGCGGATCCTGTCGCTGCTATTTTGTAGGTTGAGGCGAATTCAGTGCAACTGCG  
TTCAGCGGATCCTGTCGTAACCTATTTTGTAGACAGAGGCGAATTCAGTGCAACTGCG  
TTCAGCGGATCCTGTCGTAACCTATTTTGTAGACTGAGGCGAATTCAGTGCAACTGCG  
TTCAGCGGATCCTGTCGTAATTTACTATTTTGTAGAGGCGAATTCAGTGCAACTGCG  
TTCAGCGGATCCTGTCGTAATTAGCTATTTTGTAGAGGCGAATTCAGTGCAACTGCG  
TTCAGCGGATCCTGTCGTACTATTTTGTAGTATGAGGCGAATTCAGTGCAACTGCG  
TTCAGCGGATCCTGTCGTATGCTATTTTGTAGGAGAGGCGAATTCAGTGCAACTGCG  
TTCAGCGGATCCTGTCGTGACTATTTTGTAGAAATGAGGCGAATTCAGTGCAACTGCGG  
TTCAGCGGATCCTGTCGTGCTATTTTGTAGCTTGAGGCGAATTCAGTGCAACTGCG  
TTCAGCGGATCCTGTCGTGGCTATTTTGTAGCTCGAGGCGAATTCAGTGCAACTGCG  
TTCAGCGGATCCTGTCGTGGCTATTTTGTAGCTTGAGGCGAATTCAGTGCAACTGCGG  
TTCAGCGGATCCTGTCGTGTTACTATTTTGTAGTGAGGCGAATTCAGTGCAACTGCG

TTCAGCGGATCCTGTCGTTACTATTTTTAGACTGAGGCGAATTCAGTGCAACTGCG  
TTCAGCGGATCCTGTCGTTACTATTTTTAGTTAGAGGCGAATTCAGTGCAACTGCG  
TTCAGCGGATCCTGTCGTTAGACCCTATTTTTAGAGGCGAATTCAGTGCAACTGCG  
TTCAGCGGATCCTGTCGTTATCTATTTTTAGCTGAGGCGAATTCAGTGCAACTGCG  
TTCAGCGGATCCTGTCGTTGCTATTTTTAGCATGAGGCGAATTCAGTGCAACTGCG  
TTCAGCGGATCCTGTCGTTTACTATTTTTAGAAGAGGCGAATTCAGTGCAACTGCG  
TTCAGCGGATCCTGTCGTTTCTATTTTTAGATAGAGGCGAATTCAGTGCAACTGCG  
TTCAGCGGATCCTGTCGTTTCTATTTTTAGGAAGAGGCGAATTCAGTGCAACTGCG  
TTCAGCGGATCCTGTCGTTTCTATTTTTAGTAAGAGGCGAATTCAGTGCAACTGCG  
TTCAGCGGATCCTGTCGTTTCTATTTTTAGCTGAGGCGAATTCAGTGCAACTGCG

TTCAGCGGATCCTGTCGATACTAAAAATAGCACGAGGCGAATTCAGTGCAACTGCG  
TTCAGCGGATCCTGTCGTCCTAAAAATAGTATATGAGGCGAATTCAGTGCAACTGCG  
TTCAGCGGATCCTGTCGTTATTACCTAAAAATAGAGGCGAATTCAGTGCAACTGCG

**CTA (TTTA) TAG / CTA (TAAA) TAG**

TTCAGCGGATCCTGTCGATTCTATTTATAGGTTGAGGCGAATTCAGTGCAACTGCG  
TTCAGCGGATCCTGTCGATCCTATTTATAGAAAGAGGCGAATTCAGTGCAACTGCG  
TTCAGCGGATCCTGTCGCTCCTATTTATAGGTGGAGGCCAATTCAGTGCAACTGCG  
TTCAGCGGATCCTGTCGGAATCTATTTATAGAAGAGGCGAATTCAGTGCAACTGCG  
TTCAGCGGATCCTGTCGGTACTATTTATAGTGTGAGGCGAATTCAGTGCAACTGCG  
TTCAGCGGATCCTGTCGTTACTATTTATAGTATGAGGCGAATTCAGTGCAACTGCG  
TTCAGCGGATCCTGTCGTTCTATTTATAGATGAGGCGAATTCAGTGCAACTGCG  
TTCAGCGGATCCTGTCGTTGCTATTTATAGTCTGAGGCGAATTCAGTGCAACTGCG  
TTCAGCGGATCCTGTCGTTGTTCTATTTATAGAGAGGCGAATTCAGTGCAACTGCG

**CTA (TATT) TAG / CTA (AATA) TAG**

TTCAGCGGATCCTGTCGAATCTATATTTAGTCCGAGGCGAATTCAGTGCAACTGCG  
TTCAGCGGATCCTGTCGATATTTACTATATTTAGAGGCGAATTCAGTGCAACTGCG  
TTCAGCGGATCCTGTCGATCCTATATTTAGACAGAGGCGAATTCAGTGCAACTGCG  
TTCAGCGGATCCTGTCGCTCCTATATTTAGAACGAGGCGAATTCAGTGCAACTGCG  
TTCAGCGGATCCTGTCGTTGCTATATTTAGTTTGGAGGCGAATTCAGTGCAACTGCG

TTCAGCGGATCCTGTCGGAGCTAAATATAGATCGAGGCGAATTCAGTGCAACTGCG  
TTCAGCGGATCCTGTCGGTGATTTCTAAATATAGAGGCGAATTCAGTGCAACTGCG

**CTA (ATTA) TAG / CTA (TAAT) TAG**

TTCAGCGGATCCTGTCGAGCCTAATTATAGCCGGAGGCGAATTCAGTGCAACTGCG  
TTCAGCGGATCCTGTCGGGACTAATTATAGTCCGAGGCGAATTCAGTGCAACTGCG  
TTCAGCGGATCCTGTCGGGGTCTAATTATAGTAGAGGCGAATTCAGTGCAACTGCG  
TTCAGCGGATCCTGTCGGGTCTAATTATAGTCAGAGGCGAATTCAGTGCAACTGCG

TTCAGCGGATCCTGTCGAGCTATAATTAGATCTGAGGCGAATTCAGTGCAACTGCG  
TTCAGCGGATCCTGTCGGTGCTATAATTAGTACGAGGCGAATTCAGTGCAACTGCG  
TTCAGCGGATCCTGTCGTATCTATAATTAGAATGAGGCGAATTCAGTGCAACTGCG

**CTA (TATA) TAG**

TTCAGCGGATCCTGTCGAAACTATATATAGTAAGAGGCGAATTCAGTGCAACTGCG  
TTCAGCGGATCCTGTCGCAACTATATATAGACCGAGGCGAATTCAGTGCAACTGCG  
TTCAGCGGATCCTGTCGCTGCTATATATAGAAAGAGGCGAATTCAGTGCAACTGCG  
TTCAGCGGATCCTGTCGGCTCCTATATATAGATGAGGCGAATTCAGTGCAACTGCG  
TTCAGCGGATCCTGTCGTGCTATATATAGTCGGAGGCGAATTCAGTGCAACTGCG

TTCAGCGGATCCTGTCGTTTCTATATATAGTCGGAGGCGAATTCAGTGCAACTGCG

**CTA (AATT) TAG**

TTCAGCGGATCCTGTCGTTTCTAAATTTAGTAAGAGGCGAATTCAGTGCAACTGCG  
TTCAGCGGATCCTGTCGTGCCTAAATTTAGGTAGAGGCGAATTCAGTGCAACTGCG

**CTA (ATTT) TAG / CTA (AAAT) TAG**

TTCAGCGGATCCTGTCGGAGCTAATTTTAGCCAGAGGCGAATTCAGTGCAACTGCG

**CTA (ATAT) TAG**

TTCAGCGGATCCTGTCGTTTCTAATATTAGAATGAGGCGAATTCAGTGCAACTGCG

**CTA (ATAA) TAG / CTA (TTAT) TAG**

TTCAGCGGATCCTGTCGAGTCTAATAATAGTACGAGGCGAATTCAGTGCAACTGCG  
TTCAGCGGATCCTGTCGGAGTCTAATAATAGTAGAGGCGAATTCAGTGCAACTGCG

TTCAGCGGATCCTGTCGAAGCTATTATTAGCCAGAGGCGAATTCAGTGCAACTGCG  
TTCAGCGGATCCTGTCGATCCTATTATTAGTGTGAGGCGAATTCAGTGCAACTGCG  
TTCAGCGGATCCTGTCGCATCTATTATTAGAACGAGGCGAATTCAGTGCAACTGCG  
TTCAGCGGATCCTGTCGTCGTCTATTATTAGCTGAGGCGAATTCAGTGCAACTGCG  
TTCAGCGGATCCTGTCGTCTATTATTAGCTCATGAGGCGAATTCAGTGCAACTGCG

**CTA (TTAA) TAG**

TTCAGCGGATCCTGTCGATTTTTCTATTAATAGAGGCGAATTCAGTGCAACTGCG  
TTCAGCGGATCCTGTCGTAATATTCTATTAATAGAGGCGAATTCAGTGCAACTGCG

# AGL30/66

## Non-CArG and CArG-like

TTCAGCGGATCCTGTCGTGATGTACTAATAATCGAGGCGAACTCAGTGCACTCT-CG  
TTCAGCGGATCCTGTCGTGATGTAATAATAATAGAGGTGAATTCAGTGCAACTGGG  
TTCAGCGGATCCTGTCGCTTTTATTTTTTAGATCGAGGCGAATTCAGTGCAACTGCG  
TTCAGCGCATCCTGTCAATTTATTTTTATCAAGGAGGCGAATTCAGTGCAACTGCG  
TTCAGCGGATCCTGTCGTTTATTTTTTAGGGTAGAGGCAAATTCAGTGCAACTGCG  
TTCAGCGGATCCTGTCGTTATAAATAGGTTTGGAGGCGAATTCAGTGCAACTGCG  
TTCAGCGGATCCTGTCGTTTATTTAGCATGTGAGGCGAATTCAGTGCAACTGCG  
TTCAGCGGATCCTGTCGTTTTTGGCGGGAATG-GAGGCGAATTCAGTGCAACTGCG  
TTCAGCGGATCCTGTCGATTTCATATTCTAAATCGAGGCGAATTCAGTGCAACTGCG

TTCAGCGGATCCTGTCGACATTCTATTTTTGCGAGGCGAATTCAGTGCAACTGCG  
TTCAGCGGATCCTGTCGCGCAGCTATTTTTGTAGAGGCGAATTCAGTGCAACTGCG  
TTCAGCGGATCCTGTCGTTATTCCTTATTATTAGAGGCGAATTCAGTGCAACTGCG  
TTCAGCGGATCCTGTCGTTTATTGCTTAATATAGAGGCGAATTCAGTGCAACTGCG  
TTCAGCGGATCCTGTCGTTATTTACTTAATATAGAGGCGAATTCAGTGCAACTGCG  
TTCAGCGGATCCTGTCGATCTATATTAAGCAGTGAGGCGAATTCAGTGCAACTGCG

## SRE-type

TTCAGCGGATCCTGTCGGCCCTATTTTAGGTTGGAGGCGAATTCAGTGCAACTGCG

## CTA (TTT) TAG / CTA (AAA) TAG (= N9)

TTCAGCCGATCCTGTCGATAATCTATTTTTAGGTGAGGAGAATTCAGTGCAACTGCG  
TTCAGCGGATCCTGTCGCGCACCTATTTTTAGACCGAGGCGAATTAGTGCAACTGCCG  
TTCAGCGGATCCTGTCGTAGCTATTTTTAGACGGGAGGCGAATTCAGTGCAACTGCG  
TTCAGCGGATCCTGTCGTAGCTATTTTTAGGATTGAGGCGAATTCAGTGCAACTGCG  
TTCAGCGGATCCTGTCGTTACTATTTTTAGGCCGAGGCGAATTCAGTGCAACTGCG  
TTCAGCGGATCCTGTCGTTATCTATTTTTAGGATGAGGCGAATTCAGTGCAACTGCG

TTCAGCGGATCCTGTCGCGAGCTAAAATAGACGTGAGGCGAATTCAGTGCAACTGCG  
TTCAGCGGATCCTGTCGTTTATCTAAAATAGATGAGGCGAATTCAGTGCAACTGCG

## CTA (TTTT) TAG / CTA (AAAA) TAG

TTCAGCGGATCCTGTCGAACACTATTTTTAGGCGAGGCGAATTCAGTGCAACTGCG  
TTCAGCGGATCCTGTCGAAGCTATTTTTAGTAGGAGGCGAATTCAGTGCAACTGCG  
TTCAGCGGATCCTGTCGAATACTATTTTTAGATGAGGCGAATTCAGTGCAACTGCG  
TTCAGCGGATCCTGTCGAATCTATTTTTAGAACGAGGCGAATTCAGTGCAACTGCG  
TTCAGCGGATCCTGTCGAATCTATTTTTAGAGTGAGGCGAATTCAGTGCAACTGCG  
TTCAGCGGATCCTGTCGAATCTATTTTTAGTTAGAGGCGAATTCAGTGCAACTGCG  
TTCAGCGGATCCTGTCGACACTATTTTTAGTTTCGAGGCGAATTCAGTGCAACTGCG  
TTCAGCGGATCCTGTCGACGCTATTTTTAGTGGGAGGCGAATTCAGTGCAACTGCG  
TTCAGCGGATCCTGTCGACTATTTTTAGACATAGAGGCGAATTCAGTGCAACTGCG  
TTCAGCGGATCCTGTCGAGAAGTTCTATTTTTAGAGGCGAATTCAGTGCAACTGCG  
TTCAGCGGATCCTGTCGAGGACTATTTTTAGTAGAGGCGAATTCAGTGCAACTGCG  
TTCAGCGGATCCTGTCGATACTATTTTTAGACTGAGGCGAATTCAGTGCAACTGCG  
TTCAGCGGATCCTGTCGATACTATTTTTAGACCGAGGCGAATTCAGTGCAACTGCG  
TTCAGCGGATCCTGTCGATACTATTTTTAGTTTCGAGGCGAATTCAGTGCAACTGCG  
TTCAGCGGATCCTGTCGCAACTATTTTTAGTTAGAGGCGAATTCAGTGCAACTGCG  
TTCAGCGGATCCTGTCGCGACTATTTTTAGTGTGAGGCGAATTCAGTGCAACTGCG

TTCAGCGGATCCTGTCGCTACTATTTTTAGTACGAGGCGAAATTTTCAGTGCAACTG  
TTCAGCGGATCCTGTCGCTTCTATTTTTAGCTCGAGGCGAAATTTTCAGTGCAACTG  
TTCAGCGGATCCTGTCGAGCTATTTTTAGCATGAGGCGAATTCAGTGCAACTGCG  
TTCAGCGGATCCTGTCGGGATCTATTTTTAGAAGAGGCGAATTCAGTGCAACTGCG  
TTCAGCGGATCCTGTCGGTTCTATTTTTAGTTTCAGGCGAATTCAGTGCAACTGCG  
TTCAGCGGATCCTGTCGGTTCTATTTTTAGCTTGAGGCGAATTCAGTGCAACTGCG  
TTCAGCGGATCCTGTCGGTTTCTATTTTTAGTTGAGGCGAATTCAGTGCAACTGCG  
TTCAGCGGATCCTGTCGTAATCTATTTTTAGAGGCGAATTCAGTGCAACTGCG  
TTCAGCGGATCCTGTCGTAGCTATTTTTAGGATGAGGCGAATTCAGTGCAACTGCG  
TTCAGCGGATCCTGTCGTATAACTATTTTTAGAGAGGCGAATTCAGTGCAACTGCG  
TTCAGCGGATCCTGTCGTATGAAACTATTTTTAGAGGCGAATTCAGTGCAACTGCG  
TTCAGCGGATCCTGTCGTATCTATTTTTAGAGTGTAGGCGAATTCAGTGCAACTGCG  
TTCAGCGGATCCTGTCGTATCTATTTTTAGGATGAGGCGAATTCAGTGCAACTGCG  
TTCAGCGGATCCTGTCGTATTCTATTTTTAGTAGAGGCGAATTCAGTGCAACTGCG  
TTCAGCGGATCCTGTCGTCTTCTATTTTTAGTTGAGGCGAATTCAGTGCAACTGCG  
TTCAGCGGATCCTGTCGTGCCTATTTTTAGTGAGAGGCGAATTCAGTGCAACTGCG  
TTCAGCGGATCCTGTCGTGGCTATTTTTAGACGGAGGCGAATTCAGTGCAACTGCG  
TTCAGCGGATCCTGTCGTGGCTATTTTTAGTTAGAGGCGAATTCAGTGCAACTGCG  
TTCAGCGGATCCTGTCGTTAGGCTATTTTTAGCGAGGCGAATTCAGTGCAACTGCG  
TTCAGCGGATCCTGTCGTTCTATTTTTAGCCTGAGGCGAATTCAGTGCAACTGCG  
TTCAGCGGATCCTGTCGTTGTCTATTTTTAGCGGAGGCGAATTCAGTGCAACTGCG  
TTCAGCGGATCCTGTCGTTTCTATTTTTAGAGCGAGGCGAATTCAGTGCAACTGCG  
TTCAGCGGATCCTGTCGTTTCTATTTTTAGTATGAGGCGAATTCAGTGCAACTGCG

TTCAGCCGGACCTGTCGATATTTTCTAAAAATAGAGGCGAATTCAGTGCAACTGCG  
TTCAGCGGATCCTGTCGTAATTTCTAAAAATAGAGGCGAATTCAGTGCAACTGCG  
TTCAGCGGATCCTGTCGTAATTTCTAAAAATAGAGGCGAATTCAGTGCAACTGCG  
TTCAGCGGATCCTGTCGTAATTTCTAAAAATAGAGGCGAATTCAGTGCAACTGCG  
TTCAGCGGATCCTGTCGTTTATCTAAAAATAGAGAGGCGAATTCAGTGCAACTGCG

### **CTA (TATA) TAG**

TTCAGCGGATCCTGTCGAAATCTATATATAGATGAGGCGAATTCAGTGCAACTGCG  
TTCAGCGGATCCTGTCGAATCTATATATAGGGTGAGGCGAATTCAGTGCAACTGCG  
TTCAGCGGATCCTGTCGAATCTATATATAGATCGAGGCGAATTCAGTGCAACTGCG  
TTCAGCGGATCCTGTCGAATCTATATATAGGTGGAGGCGAATTCAGTGCAACTGCG  
TTCAGCGGATCCTGTCGAATCTATATATAGTTCGAGGCGAATTCAGTGCAACTGCG  
TTCAGCGGATCCTGTCGAGACTATATATAGGCTGAGGCGAATTCAGTGCAACTGCG  
TTCAGCGGATCCTGTCGAGAGCTATATATAGTTGAGGCGAATTCAGTGCAACTGCG  
TTCAGCGGATCCTGTCGAGCCTAACTATATATAGAGGCGAATTCAGTGCAACTGCG  
TTCAGCGGATCCTGTCGAGGAATCTATATATAGAGAGGCGAATTCAGTGCAACTGCG  
TTCAGCGGATCCTGTCGAGTCTATATATAGGTGGAGGCGAATTCAGTGCAACTGCG  
TTCAGCGGATCCTGTCGATACTATATATAGAACGAGGCGAATTCAGTGCAACTGCG  
TTCAGCGGATCCTGTCGATGCTATATATAGGCTGAGGCGAATTCAGTGCAACTGCG  
TTCAGCGGATCCTGTCGATGCTATATATAGTATGAGGCGAATTCAGTGCAACTGCG  
TTCAGCGGATCCTGTCGCCGCTATATATAGTCTGAGGCGAATTCAGTGCAACTGCG  
TTCAGCGGATCCTGTCGCCGCTATATATAGTGTGAGGCGAATTCAGTGCAACTGCG  
TTCAGCGGATCCTGTCGCCGACTATATATAGTTGAGGCGAATTCAGTGCAACTGCG  
TTCAGCGGATCCTGTCGCTACTATATATAGGGTGAGGCGAATTCAGTGCAACTGCG  
TTCAGCGGATCCTGTCGGAATCTATATATAGGAGGCGAATTCAGTGCAACTGCG  
TTCAGCGGATCCTGTCGCCCTATATATAGCCAGAGGCGAATTCAGTGCAACTGCG  
TTCAGCGGATCCTGTCGGCGCTATATATAGATGGAGGCGAATTCAGTGCAACTGCG  
TTCAGCGGATCCTGTCGGTACTATATATAGCCGGAGGCGAATTCAGTGCAACTGCG  
TTCAGCGGATCCTGTCGTAATCTATATATAGCCAGAGGCGAATTCAGTGCAACTGCG  
TTCAGCGGATCCTGTCGTACTATATATAGTTAGAGGCGAATTCAGTGCAACTGCG  
TTCAGCGGATCCTGTCGTAGCTATATATAGTCTGAGGCGAATTCAGTGCAACTGCG  
TTCAGCGGATCCTGTCGTCAACTATATATAGAAGAGGCGAATTCAGTGCAACTGCG

TTCAGCGGATCCTGTCGTGCACTATATATAGATGAGGCGAATTCAGTGCAACTGCG  
TTCAGCGGATCCTGTCGTGTCTATATATAGATTGAGGCGAATTCAGTGCAACTGCG  
TTCAGCGGATCCTGTCGTTACTATATATAGACCGAGGCGAATTCAGTGCAACTGCG  
TTCAGCGGATCCTGTCGTTACTATATATAGCCCGAGGCGAATTCAGTGCAACTGCG  
TTCAGCGGATCCTGTCGTTACTATATATAGTACGAGGCGAATTCAGTGCAACTGCG  
TTCAGCGGATCCTGTCGTTCTATATATAGACTGAGGCGAATTCAGTGCAACTGCG  
TTCAGCGGATCCTGTCGTTCTATATATAGCTTTGAGGCGAATTCAGTGCAACTGCG

**CTA (TATT) TAG / CTA (AATA) TAG**

TTCAGCGGATCCTGTCGTTACTATATTTAGTAAGAGGCGAATTCAGTGCAACTGCG  
TTCAGCGGATCCTGTCGTTCTATATTTAGGGAAGAGGCGAATTCAGTGCAACTGCG  
TTCAGCGGATCCTGTCGTTGCTATATTTAGTTAGAGGCGAATTCAGTGCAACTGCG

**CTA (TTTA) TAG / CTA (TAAA) TAG**

TTCAGCGGATCCTGTCGATACATTCTATTTATAGAGGCGAATTCAGTGCAACTGCG  
TTCAGCGGATCCTGTCGATATTCTATTTATAGAGAGGCGAATTCAGTGCAACTGCG  
TTCAGCGGATCCTGTCGTGTATTCTATTTATAGAGGCGAATTCAGTGCAACTGCG

TTCAGCGGATCCTGTCGATCATACTATAAATAGAGGCGAATTCAGTGCAACTGCG  
TTCAGCGGATCCTGTCGATTAATACTATAAATAGAGGCGAATTCAGTGCAACTGCG

**CTA (ATAA) TAG / CTA (TTAT) TAG**

TTCAGCGGATCCTGTCGTACTATTATTAGAAAAGAGGCGAATTCAGTGCAACTGCG

TTCAGCGGATCCTGTCGTTCTTTACTAATAATAGAGGCGAATTCAGTGCAACTGCG

**CTA (TAAT) TAG / CTA (ATTA) TAG**

TTCAGCGGATCCTGTCGATTTCTTCTATAATTAGAGGCGAATTCAGTGCAACTGCG
