# Supplementary material
Source: PubMed Central journal article supplement (PMC1761959)
Supplement: plntphys_pp.106.089805_3.pdf [file plntphys_pp.106.089805_3.pdf]

**cell-wall related**

AT2G15880 leucine-rich repeat family protein / extensin  
AT4G33970 leucine-rich repeat family protein / extensin  
AT1G49490 leucine-rich repeat family protein / extensin  
AT2G25630 glycosyl hydrolase family 1 protein  
AT4G39000 glycosyl hydrolase family 9 protein  
AT2G44560 glycosyl hydrolase family 9 protein  
AT2G44540 glycosyl hydrolase family 9 protein  
AT5G64790 glycosyl hydrolase family 17 protein  
AT3G52460 hydroxyproline-rich glycoprotein family protein  
AT3G20865 putative arabinogalactan-protein  
AT5G14380 hydroxyproline-rich glycoprotein family protein  
AT3G01270 pectate lyase  
AT3G62170 pectinesterase  
AT2G26450 pectinesterase  
AT3G62180 invertase/pectin methylesterase inhibitor  
AT5G50030 invertase/pectin methylesterase inhibitor  
AT4G02250 invertase/pectin methylesterase inhibitor  
AT2G10970 invertase/pectin methylesterase inhibitor

**Vesicle-transport & cytoskeleton**

AT4G29340 profilin 3  
AT3G46520 actin 12  
AT4G25590 putative actin-depolymerizing factor  
AT5G52360 actin-depolymerizing factor  
AT1G03050 clathrin assembly protein-related  
AT5G19610 sec7 domain-containing protein  
AT2G20320 DENN (AEX-3) domain-containing protein  
AT1G11250 putative syntaxin  
AT1G13890 synaptosomal-associated protein SNAP25-like  
AT3G09530 exocyst subunit EXO70 family protein  
AT4G24170 kinesin  
AT5G27000 kinesin  
AT5G42490 kinesin  
AT1G12070 Rho GDP-dissociation inhibitor

**Signal transduction**

AT1G78980 putative leucine-rich repeat transmembrane protein kinase  
AT5G35390 receptor-like protein kinase PRK1 (*Lycopersicon esculentum*)  
AT4G39110 protein kinase  
AT4G34440 protein kinase  
AT1G78940 protein kinase  
AT5G18910 protein kinase  
AT2G21480 protein kinase  
AT5G26150 protein kinase  
AT1G17540 protein kinase  
AT3G04690 protein kinase  
AT1G74490 protein kinase  
AT5G12180 calcium-dependent protein kinase  
AT4G32830 serine/threonine protein kinase  
AT1G19090 serine/threonine protein kinase (RKF2)  
AT5G24240 phosphatidylinositol 3- and 4-kinase  
AT3G56600 phosphatidylinositol 3- and 4-kinase  
AT2G41210 phosphatidylinositol-4-phosphate 5-kinase  
AT4G18700 CBL-interacting protein kinase 12 (CIPK12)  
AT5G57690 diacylglycerol kinase  
AT5G16480 tyrosine specific protein phosphatase family protein  
AT3G18220 phosphatidic acid phosphatase family protein  
AT5G24940 protein phosphatase 2C  
AT2G40180 protein phosphatase 2C

**Transport**

AT1G16380 cation/proton exchanger (CHX1)  
AT1G79400 cation/proton exchanger (CHX2)  
AT5G22900 cation/hydrogen exchanger (CHX3)  
AT1G08150 cation/hydrogen exchanger (CHX5)  
AT2G28180 cation/hydrogen exchanger (CHX8)  
AT3G52080 cation/hydrogen exchanger (CHX15)  
AT5G37060 cation/hydrogen exchanger (CHX24)  
AT5G14870 cyclic nucleotide-regulated ion channel (CNGC18)  
AT5G55930 oligopeptide transporter OPT family protein  
AT4G18790 metal ion transporter 5 (NRAMP5)  
AT4G28000 AAA-type ATPase  
AT3G42640 plasma membrane-type ATPase  
AT5G61700 ABC transporter family protein

**Protein processing**

AT2G29050 rhomboid family protein  
AT1G52580 rhomboid family protein  
AT3G49450 F-box family protein  
AT3G13820 F-box family protein  
AT2G05850 serine carboxypeptidase S10  
AT1G66210 subtilase

**Transcription factors**

AT2G42380 bZIP transcription factor  
AT1G60240 NAM-family transcription factor  
AT4G26930 MYB97 transcription factor  
AT1G04500 zinc finger CONSTANS-related  
AT4G20380 zinc finger protein (LSD1)  
AT2G21420 zinc finger protein-related  
AT2G17770 ABA-responsive element binding protein
